# Supplementary material
Source: PubMed Central journal article supplement (PMC3939906)
Supplement: 1317799111_pnas.201317799SI.pdf [file 1317799111_pnas.201317799SI.pdf]

# Supporting Information

Sheng et al. 10.1073/pnas.1317799111

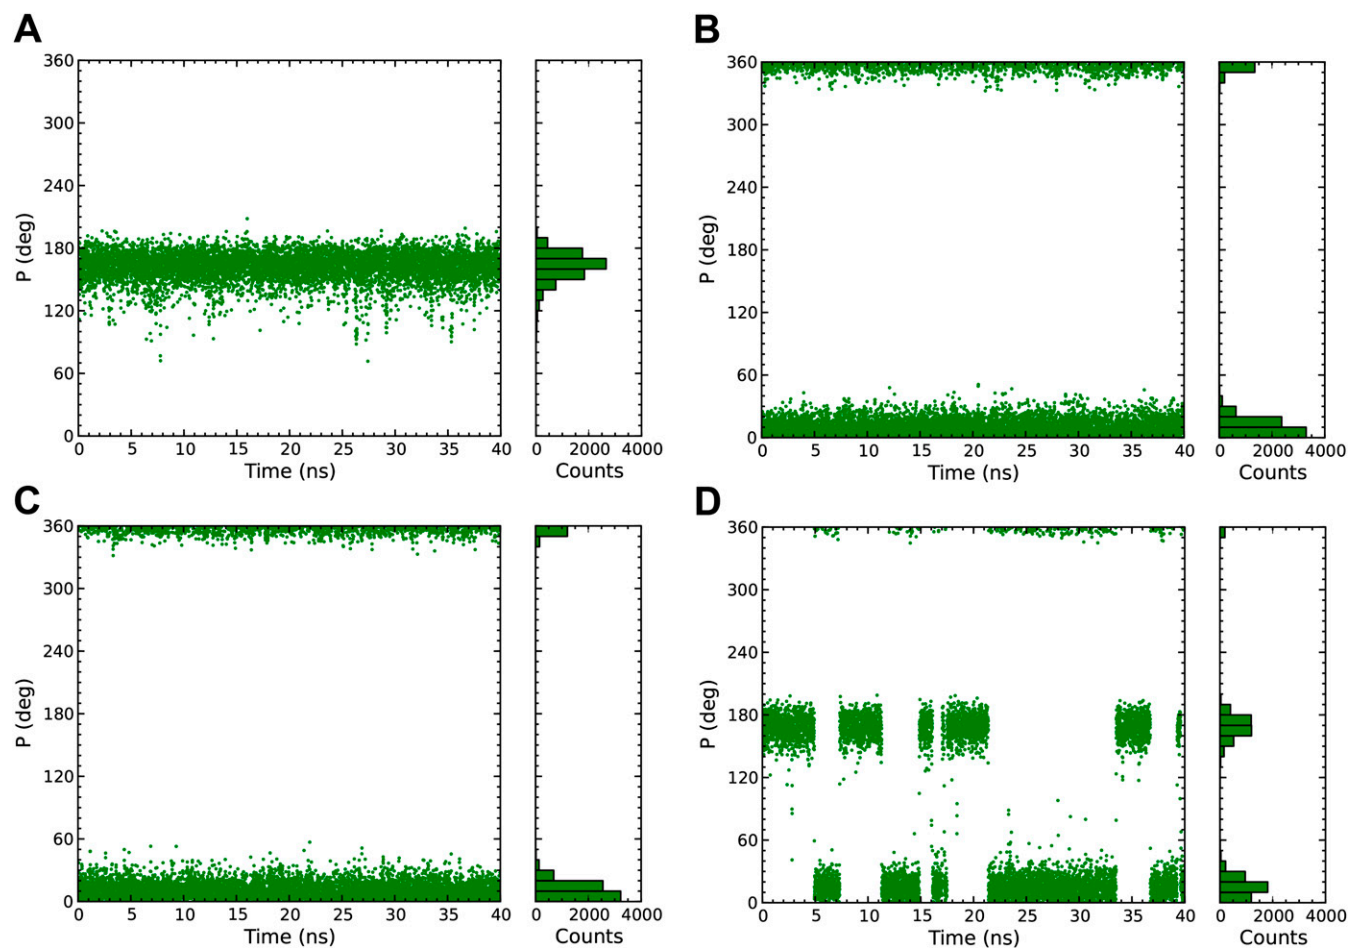

**Fig. S1.** Equilibrium distribution of pseudorotation angles calculated by molecular dynamics (MD) simulation. A total of 50-ns MD simulation was performed for the singly 2'-5'-linked RNA duplex (5'-CCGGC\*GCCGG-3'), and the last 40 ns was used in the analysis. Pseudorotation angles of C5 in strand A (A), G6 in strand A (B), G6 in strand B (C), and G10 in strand A (D) were calculated from snapshots taken every 5 ps.

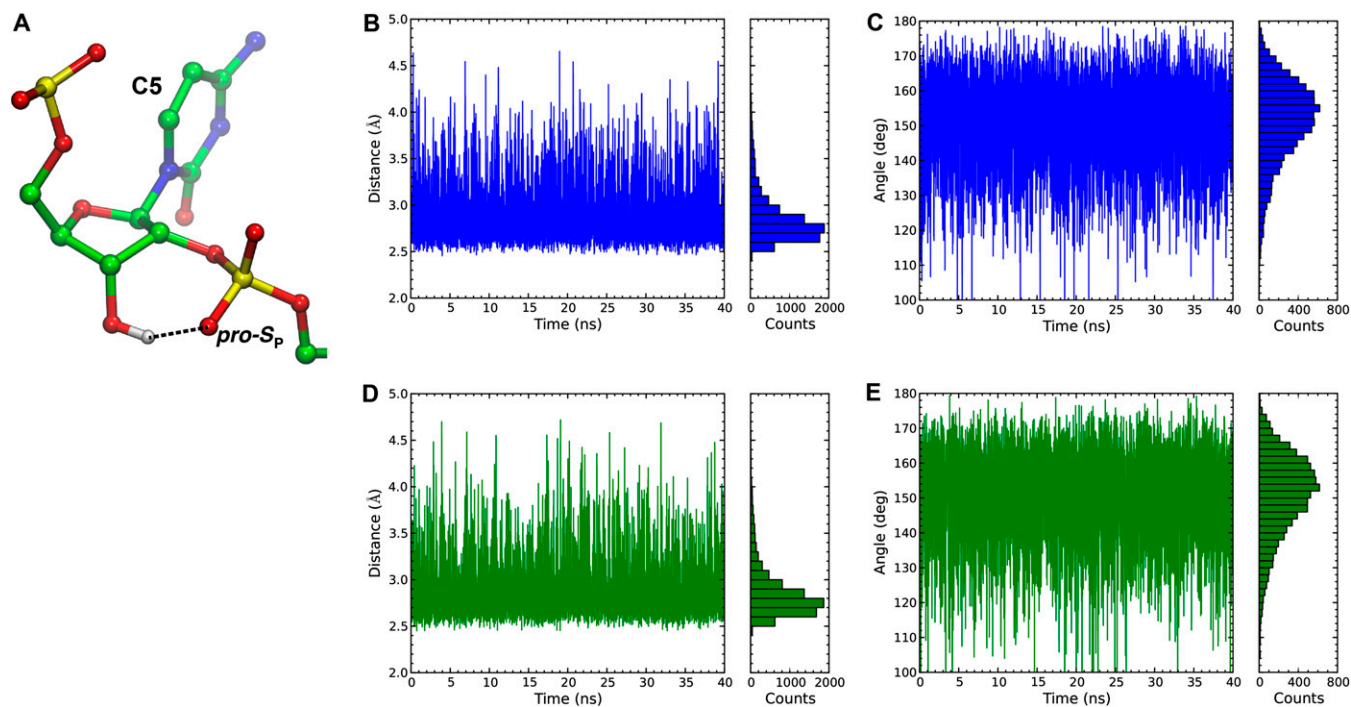

**Fig. S2.** MD simulations reveal a stable intramolecular hydrogen bond between 3'-OH and *pro-S<sub>p</sub>*-oxygen. (A) Representative snapshot from the MD simulation illustrates the hydrogen bond (dashed line). All hydrogen atoms except the one in the hydrogen bond are omitted for clarity. The evolution of the distance between O3' and *pro-S<sub>p</sub>*-oxygen and the O-H-O angle during the 40-ns production run is plotted for C5 in chain A (B and C) and chain B (D and E), respectively.

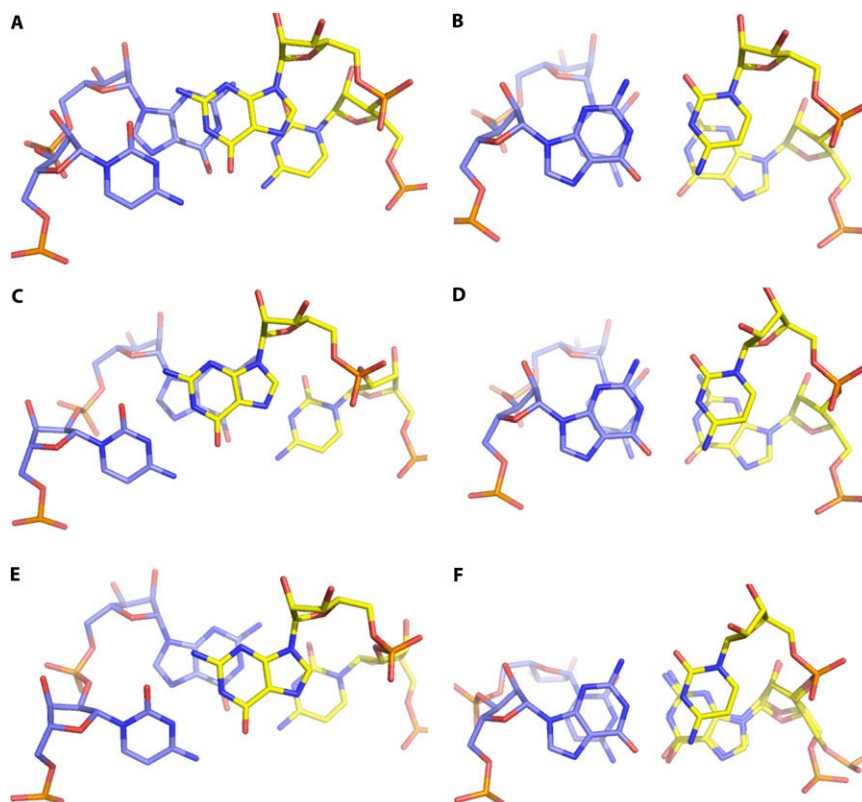

**Fig. S3.** Top views of base pair steps overlap. (A) C5-G6 step and (B) G6-C7 step in native 10-mer structure. (C) C5-G6 step and (D) G6-C7 step in single 2'-5' 10-mer structure. (E) C5-G6 step and (F) G6-C7 step in triple 2'-5' 10-mer structure.

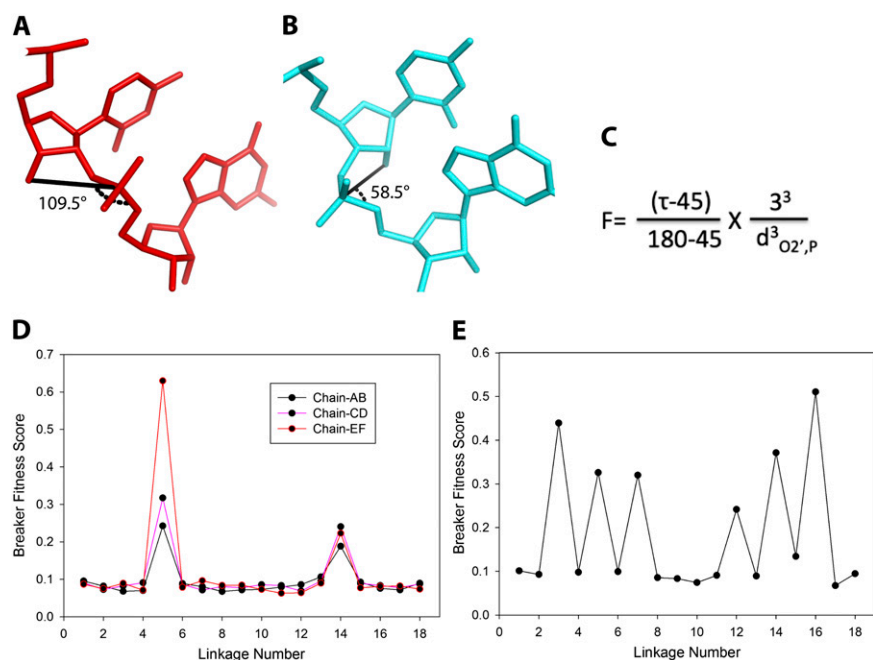

**Fig. S4.** Hydrolytic destabilization of native and 2'-5'-linked RNA. (A) Structure of 2'-5' linkage at C5-G6 step in the crystal structure, showing an O3'-P-O5' angle of 109.5°. (B) The corresponding O2'-P-O5' angle in the native C5-G6 step is 58.5°. (C) In-line fitness score formula as described by Soukup and Breaker (1). (D) In-line fitness scores of all of the linkages in the single 2'-5'- 10-mer (5'-CCGGC\*GCCGG-3', the linkage number starts from the 5'-end of one strand and then continues with the 5'-end of the other strand; there are three duplexes in one asymmetric unit). (E) In-line fitness scores of all of the linkages in the triple 2'-5' 10mer, with the same naming of linkages.

1. Soukup GA, Breaker RR (1999) Relationship between internucleotide linkage geometry and the stability of RNA. *RNA* 5(10):1308-1325.

**Table S1.** X-ray data collection and structural refinement statistics of native 10mer (5'-CCGGCGCCGG-3'), single 2'-5' 10mer (5'-CCG GC\*GCCGG-3') and triple 2'-5' 10mer (5'-CCG\*GC\*GC\*CGG-3')<sup>1</sup>

| Scaling                          | Native 10mer                    | Single 2'-5' 10mer                | Triple-2'-5' 10mer             |
|----------------------------------|---------------------------------|-----------------------------------|--------------------------------|
| Space group                      | P3 <sub>1</sub> 21              | C2                                | C22 <sub>1</sub>               |
| Unit cell parameters (Å, °)      | 22.71, 22.71, 77.72 90, 90, 120 | 96.15, 25.89, 69.72 90, 112.6, 90 | 24.22, 45.50, 81.62 90, 90, 90 |
| Resolution range, Å (last shell) | 50-1.32 (1.37-1.32)             | 30-1.55 (1.61-1.55)               | 30-1.20 (1.24-1.20)            |
| Unique reflections               | 5,742 (480)                     | 22,386 (1,611)                    | 13,957 (5,280)                 |
| Completeness, %                  | 96.0 (84.7)                     | 95.0 (69.0)                       | 95.7 (74.9)                    |
| R <sub>merge</sub> %             | 5.0 (21.3)                      | 4.0 (21.7)                        | 6.2 (28.9)                     |
| <I/σ(I)>                         | 33.2 (8.3)                      | 36.2 (3.4)                        | 24.4 (4.2)                     |
| Redundancy                       | 11.8 (10.4)                     | 5.9 (2.9)                         | 9.2 (4.9)                      |
| Refinement                       |                                 |                                   |                                |
| Molecules per asymmetric unit    | Single strand                   | Three duplexes                    | One duplex                     |
| Resolution range, Å              | 25.91-1.32                      | 30-1.55                           | 22.75-1.20                     |
| Number of reflections            | 5,463                           | 21,233                            | 13,223                         |
| Completeness, %                  | 97.1                            | 95.0                              | 95.8                           |
| R <sub>work</sub> , %            | 18.8                            | 18.2                              | 17.6                           |
| R <sub>free</sub> , %            | 22.8                            | 24.7                              | 21.7                           |
| Bond length r.m.s. Å             | 0.015                           | 0.005                             | 0.017                          |
| Bond angle r.m.s., °             | 1.71                            | 1.53                              | 1.99                           |

These RNA duplexes yielded crystals that diffracted to higher resolution than duplexes containing A:U base pairs.  $R_{merge} = \sum |I - \langle I \rangle| / \sum I$ .

**Table S2. Base pair helical and step parameters of the three structures labeled as native, s-2'-5' (single 2'-5'-linked 10mer) and t-2'-5' (triple 2'-5'-linked 10mer in which G3 in strand A is in C2'-endo conformation)**

| Base pair helical and step parameters | RNA duplex | 1     | 2     | 3            | 4     | 5            | 6     | 7            | 8     | 9     | Average |
|---------------------------------------|------------|-------|-------|--------------|-------|--------------|-------|--------------|-------|-------|---------|
|                                       |            | CC/GG | CG/CG | GG/CC        | GC/GC | CG/CG        | GC/GC | CC/GG        | CG/CG | GG/CC |         |
| X-disp (Å)                            | Native     | -4.72 | -5.02 | -3.58        | -2.51 | -4.94        | -2.51 | -3.58        | -5.03 | -4.72 | -4.07   |
|                                       | s-2'-5'    | -3.71 | -5.51 | -3.80        | -2.91 | <b>-6.12</b> | -3.06 | -4.90        | -5.39 | -4.42 | -4.43   |
|                                       | t-2'-5'    | -4.40 | -4.45 | <b>-4.27</b> | -2.85 | <b>-4.78</b> | -2.94 | <b>-5.32</b> | -5.47 | -5.51 | -4.44   |
| Inclination(°)                        | Native     | 11.13 | 20.60 | 11.35        | 5.64  | 17.72        | 5.64  | 11.35        | 20.60 | 11.13 | 12.80   |
|                                       | s-2'-5'    | 18.94 | 26.68 | 15.63        | 13.67 | <b>17.08</b> | 11.28 | 13.52        | 20.77 | 15.73 | 17.03   |
|                                       | t-2'-5'    | 22.15 | 21.57 | <b>8.05</b>  | 22.18 | <b>23.26</b> | 17.32 | <b>19.40</b> | 26.32 | 16.65 | 19.66   |
| Shift (Å)                             | Native     | -0.66 | -0.81 | 0.72         | -0.63 | 0.00         | 0.63  | -0.72        | 0.81  | 0.66  | 0.00    |
|                                       | s-2'-5'    | -0.05 | 0.06  | -0.50        | 0.23  | <b>0.28</b>  | 0.33  | 0.18         | 0.07  | 0.55  | 0.13    |
|                                       | t-2'-5'    | -0.77 | -0.28 | <b>0.28</b>  | -0.61 | <b>0.76</b>  | 0.67  | <b>-0.34</b> | 0.32  | 0.09  | 0.01    |
| Slide (Å)                             | Native     | -1.98 | -1.74 | -1.51        | -1.21 | -1.76        | -1.21 | -1.50        | -1.74 | -1.98 | -1.63   |
|                                       | s-2'-5'    | -1.41 | -1.76 | -1.53        | -1.02 | <b>-3.06</b> | -1.24 | -1.90        | -1.83 | -1.78 | -1.73   |
|                                       | t-2'-5'    | -1.69 | -1.61 | <b>-2.61</b> | -0.45 | <b>-1.93</b> | -0.98 | <b>-2.45</b> | -1.77 | -2.04 | -1.73   |
| Rise (Å)                              | Native     | 3.3   | 3.40  | 3.31         | 3.13  | 3.05         | 3.13  | 3.31         | 3.40  | 3.30  | 3.26    |
|                                       | s-2'-5'    | 3.28  | 3.18  | 3.14         | 3.05  | <b>3.44</b>  | 3.01  | 3.16         | 3.36  | 3.23  | 3.21    |
|                                       | t-2'-5'    | 3.49  | 2.98  | <b>3.71</b>  | 2.79  | <b>3.36</b>  | 2.79  | 3.45         | 3.45  | 3.39  | 3.27    |
| Tilt (°)                              | Native     | -4.09 | -2.74 | 2.03         | -1.56 | 0.00         | 1.56  | -2.03        | 2.74  | 4.09  | 0.00    |
|                                       | s-2'-5'    | -1.22 | -0.12 | -1.07        | 2.63  | <b>2.41</b>  | -1.72 | 2.05         | 1.49  | 2.99  | 0.83    |
|                                       | t-2'-5'    | -6.28 | -1.64 | <b>4.64</b>  | -1.79 | <b>1.85</b>  | 3.64  | <b>-2.46</b> | 2.20  | 0.13  | 0.03    |
| Roll (°)                              | Native     | 6.00  | 11.23 | 6.64         | 3.36  | 9.13         | 3.37  | 6.64         | 11.23 | 6.00  | 7.07    |
|                                       | s-2'-5'    | 11.83 | 13.89 | 9.33         | 7.86  | <b>10.97</b> | 6.61  | 7.30         | 10.80 | 9.05  | 9.74    |
|                                       | t-2'-5'    | 13.96 | 12.14 | <b>5.77</b>  | 11.02 | <b>14.53</b> | 10.10 | <b>12.24</b> | 14.32 | 8.66  | 11.42   |
| Twist (°)                             | Native     | 30.72 | 30.26 | 33.55        | 34.58 | 28.94        | 34.57 | 33.56        | 30.26 | 30.72 | 31.91   |
|                                       | s-2'-5'    | 35.16 | 28.07 | 34.03        | 32.73 | <b>35.67</b> | 33.04 | 30.28        | 29.09 | 32.40 | 32.27   |
|                                       | t-2'-5'    | 34.65 | 31.17 | <b>41.59</b> | 27.34 | <b>34.48</b> | 32.81 | <b>35.39</b> | 29.36 | 29.32 | 32.90   |

Significant structural perturbations are shown in bold.

**Table S3. Summary of MD simulations**

| System                                                 | Simulation method | Simulation time (ns) |
|--------------------------------------------------------|-------------------|----------------------|
| Native duplex                                          | Unbiased          | 50                   |
| Single 2'-5'-linked duplex                             | Unbiased          | 50                   |
| Triple 2'-5'-linked duplex (conformer A*)              | Unbiased          | 50                   |
| Triple 2'-5'-linked duplex (conformer B <sup>†</sup> ) | Unbiased          | 50                   |
| Native duplex                                          | Umbrella sampling | 0.4 × 16 × 5 = 32    |
| Single 2'-5'-linked duplex                             | Umbrella sampling | 0.4 × 16 × 5 = 32    |
| Triple 2'-5'-linked duplex (conformer A*)              | Umbrella sampling | 0.4 × 16 × 5 = 32    |
| Total                                                  |                   | 296                  |

\*Conformer A corresponds to the structure in which G3 in strand A is in C2'-endo conformation.

†Conformer B corresponds to the structure in which G3 in strand A is in C3'-endo conformation.

**Table S4. Structural parameters of base pair steps in RNA duplexes calculated from MD simulations**

| Base pair step parameter | RNA duplex | Base pair step index |                   |                   |                   |                   |                   |            |  |
|--------------------------|------------|----------------------|-------------------|-------------------|-------------------|-------------------|-------------------|------------|--|
|                          |            | 2                    | 3                 | 4                 | 5                 | 6                 | 7                 | 8          |  |
| Shift (Å)                | N          | 0.0 ± 0.7            | 0.1 ± 0.7         | -0.1 ± 0.6        | -0.1 ± 0.7        | 0.1 ± 0.6         | -0.1 ± 0.6        | 0.0 ± 0.7  |  |
|                          | S          | -0.0 ± 0.7           | 0.1 ± 0.6         | -0.2 ± 0.5        | 0.0 ± 0.5         | 0.3 ± 0.6         | -0.2 ± 0.6        | 0.0 ± 0.7  |  |
|                          | TA         | -0.5 ± 0.7           | 0.1 ± 0.4         | 0.2 ± 0.4         | 0.0 ± 0.5         | -0.1 ± 0.5        | -0.1 ± 0.4        | 0.8 ± 1.0  |  |
|                          | TB         | -0.6 ± 0.7           | 0.0 ± 0.4         | 0.2 ± 0.4         | -0.1 ± 0.6        | -0.1 ± 0.5        | -0.0 ± 0.5        | 0.9 ± 1.0  |  |
| Slide (Å)                | N          | -1.7 ± 0.4           | -1.9 ± 0.3        | -1.5 ± 0.5        | -1.8 ± 0.4        | -1.4 ± 0.5        | -1.9 ± 0.3        | -1.7 ± 0.4 |  |
|                          | S          | -1.7 ± 0.4           | -1.9 ± 0.4        | <b>-1.0 ± 0.5</b> | <b>-2.6 ± 0.4</b> | <b>-1.0 ± 0.5</b> | -1.9 ± 0.3        | -1.7 ± 0.4 |  |
|                          | TA         | -1.4 ± 0.4           | <b>-2.3 ± 0.3</b> | <b>-0.8 ± 0.4</b> | <b>-2.4 ± 0.3</b> | <b>-0.9 ± 0.5</b> | <b>-2.3 ± 0.3</b> | -1.5 ± 0.5 |  |
|                          | TB         | -1.4 ± 0.4           | <b>-2.3 ± 0.3</b> | <b>-0.9 ± 0.4</b> | <b>-2.5 ± 0.4</b> | <b>-0.9 ± 0.5</b> | <b>-2.3 ± 0.3</b> | -1.5 ± 0.5 |  |
| Rise (Å)                 | N          | 3.7 ± 0.4            | 3.2 ± 0.3         | 3.2 ± 0.2         | 3.6 ± 0.4         | 3.2 ± 0.2         | 3.2 ± 0.3         | 3.7 ± 0.4  |  |
|                          | S          | 3.7 ± 0.4            | 3.1 ± 0.3         | <b>3.0 ± 0.3</b>  | <b>4.0 ± 0.4</b>  | <b>3.0 ± 0.2</b>  | 3.1 ± 0.3         | 3.7 ± 0.4  |  |
|                          | TA         | 3.4 ± 0.4            | 3.4 ± 0.3         | <b>2.9 ± 0.3</b>  | <b>3.9 ± 0.4</b>  | <b>2.9 ± 0.3</b>  | 3.4 ± 0.3         | 3.4 ± 0.5  |  |
|                          | TB         | 3.4 ± 0.4            | 3.4 ± 0.3         | <b>2.9 ± 0.3</b>  | <b>3.9 ± 0.4</b>  | <b>2.9 ± 0.3</b>  | 3.4 ± 0.3         | 3.4 ± 0.6  |  |
| Tilt (°)                 | N          | 0 ± 4                | -2 ± 4            | 1 ± 4             | 0 ± 5             | -1 ± 4            | 2 ± 4             | 0 ± 4      |  |
|                          | S          | 0 ± 4                | -3 ± 4            | 3 ± 4             | 0 ± 6             | 3 ± 4             | 3 ± 4             | 0 ± 4      |  |
|                          | TA         | -2 ± 4               | -2 ± 4            | 2 ± 5             | 1 ± 6             | -2 ± 5            | 2 ± 5             | 0 ± 6      |  |
|                          | TB         | -2 ± 4               | -2 ± 4            | 2 ± 5             | 0 ± 6             | -2 ± 5            | 2 ± 5             | 2 ± 6      |  |
| Roll (°)                 | N          | 18 ± 8               | 9 ± 5             | 5 ± 5             | 16 ± 7            | 5 ± 4             | 9 ± 5             | 17 ± 7     |  |
|                          | S          | 18 ± 8               | 8 ± 5             | 7 ± 5             | 17 ± 7            | 6 ± 5             | 8 ± 5             | 18 ± 8     |  |
|                          | TA         | 22 ± 6               | 10 ± 5            | 7 ± 4             | 16 ± 6            | 7 ± 5             | 9 ± 5             | 21 ± 8     |  |
|                          | TB         | 21 ± 6               | 9 ± 5             | 8 ± 4             | 17 ± 6            | 9 ± 5             | 10 ± 5            | 22 ± 8     |  |
| Twist (°)                | N          | 30 ± 4               | 28 ± 4            | 32 ± 4            | 28 ± 4            | 33 ± 4            | 28 ± 4            | 29 ± 4     |  |
|                          | S          | 29 ± 4               | 28 ± 4            | 34 ± 4            | <b>37 ± 4</b>     | 33 ± 4            | 28 ± 4            | 30 ± 4     |  |
|                          | TA         | 29 ± 5               | <b>37 ± 3</b>     | 36 ± 4            | <b>37 ± 4</b>     | 35 ± 4            | <b>36 ± 4</b>     | 27 ± 7     |  |
|                          | TB         | 29 ± 5               | <b>37 ± 3</b>     | 36 ± 4            | <b>36 ± 4</b>     | 35 ± 4            | <b>36 ± 4</b>     | 28 ± 7     |  |

Significant structural perturbations are shown in bold. N, native duplex; S, single 2'-5'-linked 10mer; TA, triple 2'-5'-linked 10mer starting with conformer A; TB, triple 2'-5'-linked 10mer starting with conformer B.

**Table S5. Structural parameters of base pairs in RNA duplexes calculated from MD simulations**

| Base pair parameter         | RNA duplex | Base pair index   |                   |                   |                   |                   |                   |                   |                  |
|-----------------------------|------------|-------------------|-------------------|-------------------|-------------------|-------------------|-------------------|-------------------|------------------|
|                             |            | 2                 | 3                 | 4                 | 5                 | 6                 | 7                 | 8                 | 9                |
| Shear (Å)                   | N          | 0.2 ± 0.4         | -0.2 ± 0.4        | -0.4 ± 0.5        | 0.3 ± 0.4         | -0.4 ± 0.4        | 0.5 ± 0.4         | 0.3 ± 0.4         | -0.3 ± 0.4       |
|                             | S          | 0.3 ± 0.5         | -0.3 ± 0.4        | -0.5 ± 0.5        | 0.3 ± 0.3         | -0.3 ± 0.3        | 0.5 ± 0.5         | 0.3 ± 0.4         | -0.3 ± 0.4       |
|                             | TA         | 0.5 ± 0.7         | -0.3 ± 0.3        | -0.4 ± 0.3        | 0.3 ± 0.3         | -0.3 ± 0.4        | 0.4 ± 0.3         | 0.3 ± 0.3         | -0.7 ± 1.1       |
|                             | TB         | 0.4 ± 0.7         | -0.3 ± 0.3        | -0.5 ± 0.3        | 0.2 ± 0.3         | -0.3 ± 0.4        | 0.4 ± 0.3         | 0.4 ± 0.4         | -0.8 ± 1.1       |
| Stretch (Å)                 | N          | -0.1 ± 0.2        | -0.2 ± 0.1        | -0.1 ± 0.2        | -0.1 ± 0.2        | -0.1 ± 0.2        | -0.1 ± 0.2        | -0.1 ± 0.1        | -0.1 ± 0.2       |
|                             | S          | -0.1 ± 0.2        | -0.1 ± 0.1        | <b>-0.1 ± 0.2</b> | <b>-0.1 ± 0.1</b> | <b>-0.1 ± 0.1</b> | <b>-0.1 ± 0.1</b> | -0.1 ± 0.2        | -0.1 ± 0.1       |
|                             | TA         | <b>-0.1 ± 0.3</b> | <b>-0.2 ± 0.1</b> | <b>-0.1 ± 0.1</b> | <b>-0.1 ± 0.1</b> | <b>-0.1 ± 0.1</b> | <b>-0.1 ± 0.1</b> | <b>-0.2 ± 0.1</b> | <b>0.0 ± 0.5</b> |
|                             | TB         | -0.1 ± 0.3        | -0.1 ± 0.1        | -0.2 ± 0.1        | -0.1 ± 0.1        | -0.1 ± 0.1        | -0.1 ± 0.1        | -0.2 ± 0.1        | 0.1 ± 0.5        |
| Stagger (Å)                 | N          | -0.3 ± 0.4        | -0.2 ± 0.4        | -0.1 ± 0.4        | -0.2 ± 0.4        | -0.2 ± 0.4        | -0.0 ± 0.4        | -0.2 ± 0.4        | -0.3 ± 0.4       |
|                             | S          | -0.2 ± 0.4        | -0.2 ± 0.4        | <b>0.1 ± 0.4</b>  | <b>-0.3 ± 0.4</b> | <b>-0.3 ± 0.4</b> | 0.1 ± 0.4         | -0.3 ± 0.4        | -0.3 ± 0.4       |
|                             | TA         | -0.1 ± 0.5        | -0.1 ± 0.3        | <b>0.0 ± 0.4</b>  | <b>-0.2 ± 0.4</b> | <b>-0.2 ± 0.4</b> | 0.0 ± 0.4         | -0.1 ± 0.3        | -0.1 ± 0.6       |
|                             | TB         | -0.1 ± 0.5        | -0.0 ± 0.3        | <b>0.0 ± 0.4</b>  | -0.2 ± 0.4        | -0.2 ± 0.4        | 0.0 ± 0.4         | -0.1 ± 0.4        | 0.0 ± 0.7        |
| Buckle (°)                  | N          | 9 ± 10            | -7 ± 9            | -4 ± 10           | 6 ± 10            | -6 ± 9            | 3 ± 9             | 7 ± 9             | -8 ± 10          |
|                             | S          | 8 ± 10            | -7 ± 9            | -2 ± 9            | <b>15 ± 10</b>    | <b>-16 ± 10</b>   | 3 ± 9             | 8 ± 9             | -10 ± 10         |
|                             | TA         | 11 ± 11           | 5 ± 8             | -7 ± 9            | <b>16 ± 10</b>    | <b>-17 ± 10</b>   | 6 ± 9             | -4 ± 10           | -8 ± 13          |
|                             | TB         | 10 ± 11           | 5 ± 9             | -6 ± 9            | <b>17 ± 10</b>    | <b>-17 ± 10</b>   | 6 ± 9             | -4 ± 10           | -12 ± 15         |
| Propeller (°)               | N          | -16 ± 9           | -14 ± 8           | -10 ± 8           | -14 ± 8           | -15 ± 8           | -10 ± 8           | -14 ± 8           | -16 ± 9          |
|                             | S          | -16 ± 9           | -15 ± 8           | -10 ± 8           | -10 ± 8           | -9 ± 8            | -9 ± 8            | -15 ± 8           | -17 ± 10         |
|                             | TA         | -25 ± 9           | -9 ± 7            | -9 ± 7            | -11 ± 7           | -12 ± 7           | -7 ± 7            | -8 ± 7            | -24 ± 11         |
|                             | TB         | -26 ± 9           | -8 ± 7            | -8 ± 7            | -11 ± 8           | -12 ± 8           | -7 ± 7            | -9 ± 7            | -29 ± 12         |
| Opening (°)                 | N          | -0 ± 5            | -1 ± 6            | 1 ± 5             | -0 ± 6            | -1 ± 5            | -0 ± 5            | -1 ± 4            | -1 ± 5           |
|                             | S          | -0 ± 6            | -1 ± 4            | 0 ± 5             | <b>-2 ± 4</b>     | -2 ± 4            | 2 ± 6             | -1 ± 4            | -1 ± 5           |
|                             | TA         | 4 ± 10            | <b>-2 ± 3</b>     | -2 ± 4            | <b>-2 ± 4</b>     | -2 ± 4            | <b>-2 ± 4</b>     | -2 ± 4            | 9 ± 17           |
|                             | TB         | 5 ± 10            | -2 ± 4            | -2 ± 4            | -1 ± 4            | -1 ± 4            | -2 ± 4            | -2 ± 4            | 10 ± 17          |
| Pseudorotation strand A (°) | N          | 19 ± 11           | 13 ± 8            | 10 ± 7            | 13 ± 9            | 12 ± 7            | 11 ± 8            | 13 ± 8            | 13 ± 7           |
|                             | S          | 18 ± 11           | 13 ± 8            | 10 ± 7            | 14 ± 9            | 164 ± 13          | 8 ± 9             | 12 ± 8            | 13 ± 7           |
|                             | TA         | 18 ± 11           | 13 ± 8            | <b>165 ± 13</b>   | 10 ± 8            | 165 ± 12          | 8 ± 9             | <b>164 ± 12</b>   | 9 ± 7            |
|                             | TB         | 18 ± 11           | 13 ± 8            | <b>165 ± 14</b>   | 10 ± 8            | 165 ± 12          | 8 ± 9             | <b>164 ± 12</b>   | 9 ± 7            |
| Pseudorotation strand B (°) | N          | 12 ± 7            | 13 ± 8            | 12 ± 8            | 11 ± 7            | 13 ± 9            | 10 ± 7            | 13 ± 8            | 19 ± 11          |
|                             | S          | 13 ± 8            | 12 ± 8            | 8 ± 9             | <b>164 ± 13</b>   | 15 ± 10           | 10 ± 7            | 13 ± 8            | 19 ± 11          |
|                             | TA         | 8 ± 7             | <b>166 ± 11</b>   | 8 ± 9             | <b>165 ± 12</b>   | 11 ± 9            | <b>163 ± 17</b>   | 14 ± 8            | 18 ± 11          |
|                             | TB         | 8 ± 7             | <b>166 ± 11</b>   | 9 ± 9             | <b>164 ± 13</b>   | 12 ± 9            | <b>164 ± 16</b>   | 14 ± 9            | 17 ± 10          |

Significant structural perturbations are shown in bold. N, native duplex; S, single 2'-5'-linked 10mer; TA, triple 2'-5'-linked 10mer starting with conformer A; TB, triple 2'-5'-linked 10mer starting with conformer B.

**Table S6. Overlap area summary of each base pair steps in the three duplex structures**

| Step number | Step  | Total overlap area |         |         |
|-------------|-------|--------------------|---------|---------|
|             |       | Native             | s-2'-5' | t-2'-5' |
| 1           | CC/GG | 4.54               | 3.68    | 4.41    |
| 2           | CG/CG | 4.02               | 4.38    | 4.90    |
| 3           | GG/CC | 4.38               | 3.15    | 4.78    |
| 4           | GC/GC | 11.67              | 10.74   | 9.50    |
| 5           | CG/CG | 4.31               | 7.96    | 4.51    |
| 6           | GC/GC | 11.67              | 12.05   | 10.95   |
| 7           | CC/GG | 4.38               | 3.46    | 3.81    |
| 8           | CG/CG | 4.03               | 4.44    | 4.36    |
| 9           | GG/CC | 4.54               | 4.43    | 3.82    |
| Overall     |       | 53.54              | 54.29   | 51.04   |

The total overlap area (in Å<sup>2</sup>) includes both intrastrand and interstrand overlap within the four bases of each base pair step. s-2'-5', single 2'-5'-linked 10mer; t-2'-5', triple 2'-5'-linked 10mer in which G3 in strand A is in C2'-endo conformation.
